# Supplementary material for: Whether regional lymph nodes evaluation should be equally required for both right and left colon cancer
Source: PubMed Central journal article supplement (PMC5312360; doi:10.18632/oncotarget.11007), 2016-08-02
Supplement: oncotarget-07-59945-s001.pdf [file oncotarget-07-59945-s001.pdf]

# Whether regional lymph nodes evaluation should be equally required for both right and left colon cancer

## SUPPLEMENTARY FIGURES AND TABLES

Comparisons of rates of node  $\geq$  new cutoff values (11 for LCC/15 for RCC) by tumor locations

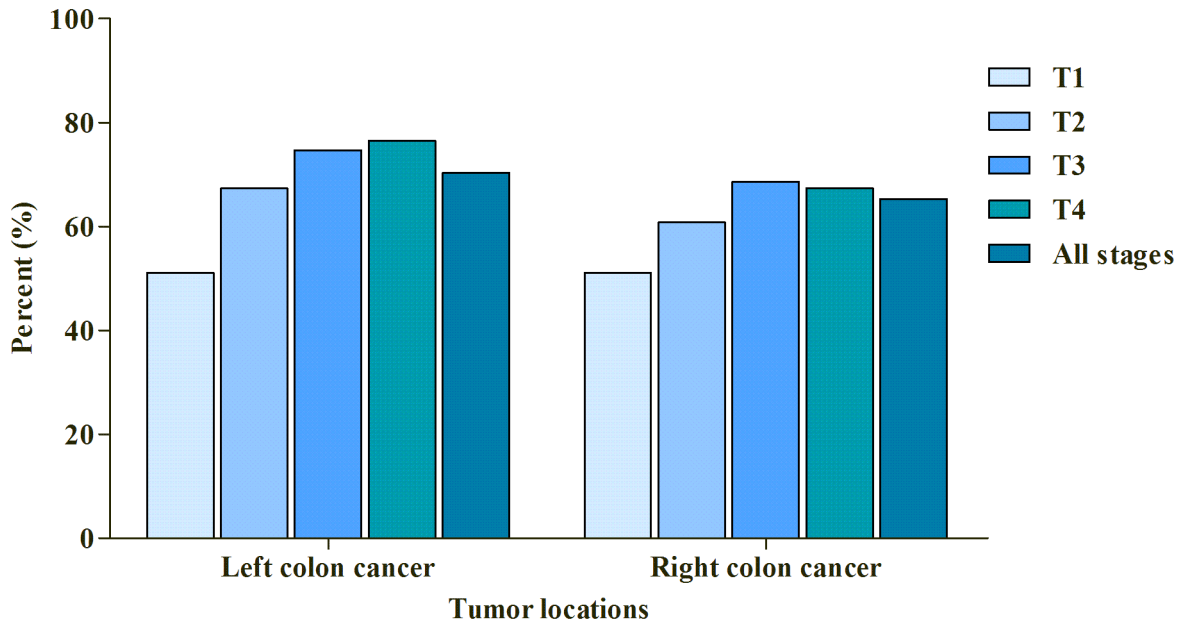

Supplementary Figure S1: Comparison of rate of node  $\geq$  new cutoff values between RCC and LCC.

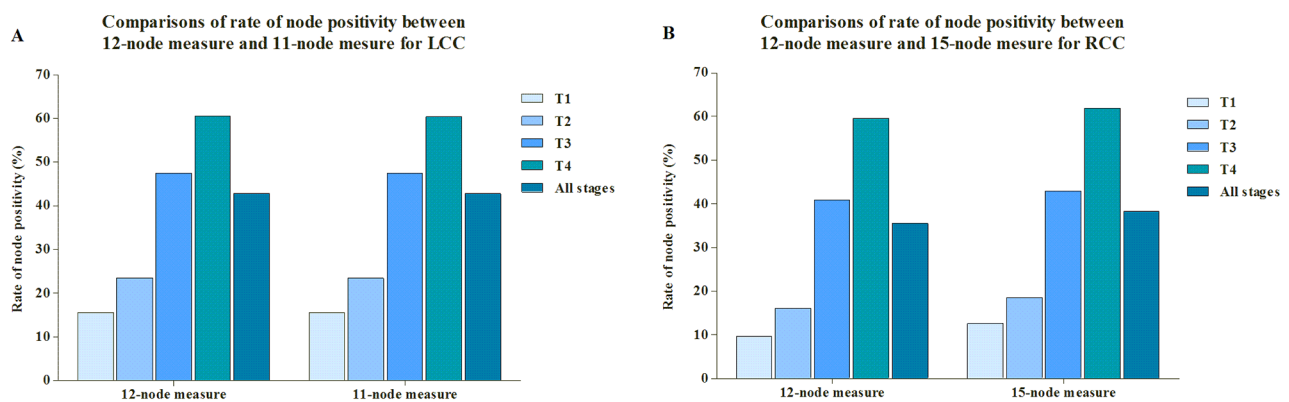

Supplementary Figure S2: A. The comparisons of rate of node positivity between 12-node measure and 11-node measure for LCC. B. The comparisons of rate of node positivity between 12-node measure and 15-node measure for RCC.

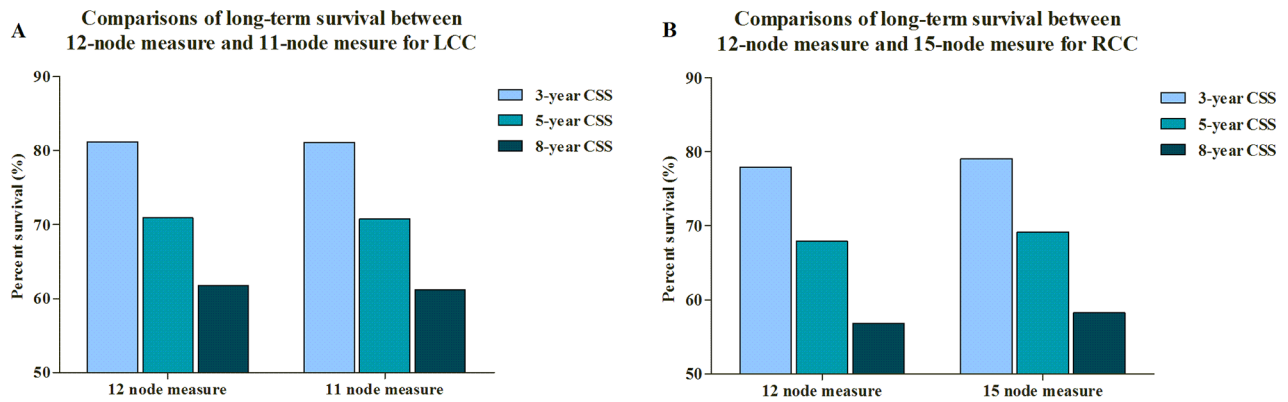

**Supplementary Figure S3:** A. The comparisons of long-term survivals between 12-node measure and 11-node measure for LCC. B. The comparisons of long-term survivals between 12-node measure and 15-node measure for RCC.

**Supplementary Table S1: Relative odds of node positivity among RCC patients: multivariate logistic regression**

| Characteristic    |                         | OR [95% CI]         | P      |
|-------------------|-------------------------|---------------------|--------|
| Node examined     | <12                     | 1                   | 0.376  |
|                   | ≥12                     | 0.979 [0.933-1.027] |        |
| Gender            | Female                  | 1                   | 0.640  |
|                   | Male                    | 0.991 [0.954-1.029] |        |
| Age               | 20-59                   | 1                   | <0.001 |
|                   | ≥60                     | 0.735 [0.702-0.770] |        |
| Race              | White                   | 1                   | <0.001 |
|                   | Black                   | 1.186 [1.119-1.258] |        |
|                   | Others                  | 1.128 [1.048-1.215] |        |
| AJCC T Stage      | T1                      | 1                   | <0.001 |
|                   | T2                      | 1.415 [1.288-1.554] |        |
|                   | T3                      | 4.581 [4.229-4.963] |        |
|                   | T4                      | 8.721 [7.943-9.575] |        |
| Histological type | Adenocarcinoma          | 1                   | 0.008  |
|                   | Mucous/signet-ring cell | 1.070 [1.014-1.128] |        |
|                   | Others                  | 0.831 [0.679-1.019] |        |
| Grade             | Grade I/II              | 1                   | <0.001 |
|                   | Grade III/IV            | 1.972 [1.887-2.060] |        |

Supplementary Table S2: Relative odds of node positivity among LCC patients: multivariate logistic regression

| Characteristic    |                         | OR [95% CI]         | P      |
|-------------------|-------------------------|---------------------|--------|
| Node examined     | <12                     | 1                   | 0.111  |
|                   | ≥12                     | 1.072 [0.984-1.167] |        |
| Gender            | Female                  | 1                   | 0.771  |
|                   | Male                    | 0.989 [0.915-1.068] |        |
| Age               | 20-59                   | 1                   | <0.001 |
|                   | ≥60                     | 0.644 [0.594-0.699] |        |
| Race              | White                   | 1                   | <0.001 |
|                   | Black                   | 1.207 [1.084-1.344] |        |
|                   | Others                  | 1.298 [1.139-1.479] |        |
| AJCC T Stage      | T1                      | 1                   | <0.001 |
|                   | T2                      | 1.291 [1.086-1.534] |        |
|                   | T3                      | 3.426 [2.988-3.928] |        |
|                   | T4                      | 5.097 [4.299-6.043] |        |
| Histological type | Adenocarcinoma          | 1                   | 0.494  |
|                   | Mucous/signet-ring cell | 0.928 [0.808-1.067] |        |
|                   | Others                  | 0.830 [0.446-1.544] |        |
| Grade             | Grade I/II              | 1                   | <0.001 |
|                   | Grade III/IV            | 1.910 [1.712-2.131] |        |

Supplementary Table S3: Univariate and multivariate analyses RCC patients

| Characteristic           | Univariate analysis     |                     | Multivariate analysis |                     |        |
|--------------------------|-------------------------|---------------------|-----------------------|---------------------|--------|
|                          |                         | HR [95% CI]         | P                     | HR [95% CI]         | P      |
| <b>Gender</b>            | Female                  | 1                   | 0.975                 |                     |        |
|                          | Male                    | 0.999 [0.969-1.031] |                       |                     |        |
| <b>Age</b>               | 20-59                   | 1                   | <0.001                | 1                   | <0.001 |
|                          | ≥60                     | 2.435 [2.316-2.561] |                       | 2.570 [2.443-2.704] |        |
| <b>Race</b>              | White                   | 1                   | <0.001                | 1                   | <0.001 |
|                          | Black                   | 0.955 [0.909-1.002] |                       | 1.088 [1.036-1.142] |        |
|                          | Others                  | 0.697 [0.649-0.749] |                       | 0.709 [0.659-0.762] |        |
| <b>AJCC Stage</b>        | Stage I                 | 1                   | <0.001                | 1                   | <0.001 |
|                          | Stage II                | 1.436 [1.373-1.503] |                       | 1.480 [1.438-1.496] |        |
|                          | Stage III               | 2.335 [2.235-2.440] |                       | 2.426 [2.279-2.649] |        |
| <b>AJCC T Stage</b>      | T1                      | 1                   | <0.001                | 1                   | <0.001 |
|                          | T2                      | 1.241 [1.156-1.333] |                       | 1.226 [1.140-1.318] |        |
|                          | T3                      | 1.842 [1.734-1.957] |                       | 1.969 [1.775-2.185] |        |
|                          | T4                      | 3.451 [3.222-3.696] |                       | 3.394 [3.044-3.783] |        |
| <b>AJCC N Stage</b>      | N0                      | 1                   | <0.001                | 1                   | <0.001 |
|                          | N1/2                    | 1.848 [1.792-1.907] |                       | 1.264 [1.102-1.450] |        |
| <b>Histological type</b> | Adenocarcinoma          | 1                   | <0.001                | 1                   | <0.001 |
|                          | Mucous/signet-ring cell | 1.156 [1.109-1.206] |                       | 1.048 [1.004-1.093] |        |
|                          | Others                  | 1.917 [1.592-2.309] |                       | 1.375 [1.181-1.600] |        |
| <b>Grade</b>             | Grade I/II              | 1                   | <0.001                | 1                   | <0.001 |
|                          | Grade III/IV            | 1.496 [1.446-1.549] |                       | 1.229 [1.186-1.274] |        |
| <b>Node examined</b>     | <12                     | 1                   | <0.001                | 1                   | 0.001  |
|                          | ≥12                     | 0.718 [0.694-0.743] |                       | 0.692 [0.668-0.717] |        |

Supplementary Table S4: Univariate and multivariate analyses for LCC patients

| Characteristic           | Univariate analysis     |                     | Multivariate analysis |                     |        |
|--------------------------|-------------------------|---------------------|-----------------------|---------------------|--------|
|                          |                         | HR [95% CI]         | P                     | HR [95% CI]         | P      |
| <b>Gender</b>            | Female                  | 1                   | 0.121                 |                     |        |
|                          | Male                    | 1.057 [0.986-1.133] |                       |                     |        |
| <b>Age</b>               | 20-59                   | 1                   | <0.001                | 1                   | <0.001 |
|                          | ≥60                     | 2.413 [2.209-2.637] |                       | 2.557 [2.338-2.796] |        |
| <b>Race</b>              | White                   | 1                   | <0.001                | 1                   | <0.001 |
|                          | Black                   | 1.124 [1.023-1.235] |                       | 1.231 [1.120-1.354] |        |
|                          | Others                  | 0.738 [0.644-0.846] |                       | 0.745 [0.650-0.855] |        |
| <b>AJCC Stage</b>        | Stage I                 | 1                   | <0.001                | 1                   | <0.001 |
|                          | Stage II                | 1.644 [1.477-1.829] |                       | 1.779 [1.626-1.976] |        |
|                          | Stage III               | 2.246 [2.025-2.491] |                       | 2.001 [1.730-2.350] |        |
| <b>AJCC T Stage</b>      | T1                      | 1                   | <0.001                | 1                   | <0.001 |
|                          | T2                      | 1.430 [1.212-1.686] |                       | 1.458 [1.230-1.728] |        |
|                          | T3                      | 2.113 [1.851-2.412] |                       | 2.467 [1.952-3.119] |        |
|                          | T4                      | 4.041 [3.477-4.697] |                       | 4.579 [3.585-5.848] |        |
| <b>AJCC N Stage</b>      | N0                      | 1                   | <0.001                | 1                   | 0.133  |
|                          | N1/2                    | 1.579 [1.473-1.693] |                       | 1.199 [0.946-1.519] |        |
| <b>Histological type</b> | Adenocarcinoma          | 1                   | <0.001                | 1                   | 0.354  |
|                          | Mucous/signet-ring cell | 1.292 [1.152-1.448] |                       | 1.089 [0.970-1.222] |        |
|                          | Others                  | 1.119 [0.674-1.858] |                       | 1.006 [0.604-1.677] |        |
| <b>Grade</b>             | Grade I/II              | 1                   | <0.001                | 1                   | <0.001 |
|                          | Grade III/IV            | 1.541 [1.410-1.685] |                       | 1.328 [1.213-1.455] |        |
| <b>Node examined</b>     | <12                     | 1                   | <0.001                | 1                   | <0.001 |
|                          | ≥12                     | 0.813 [0.757-0.872] |                       | 0.737 [0.686-0.793] |        |
